# Supplementary figures and images for: Surface phase diagrams from nested sampling
Source: Royal Society of Chemistry journal article supplement (doi:10.1039/d4cp00050a), 2024-01-01

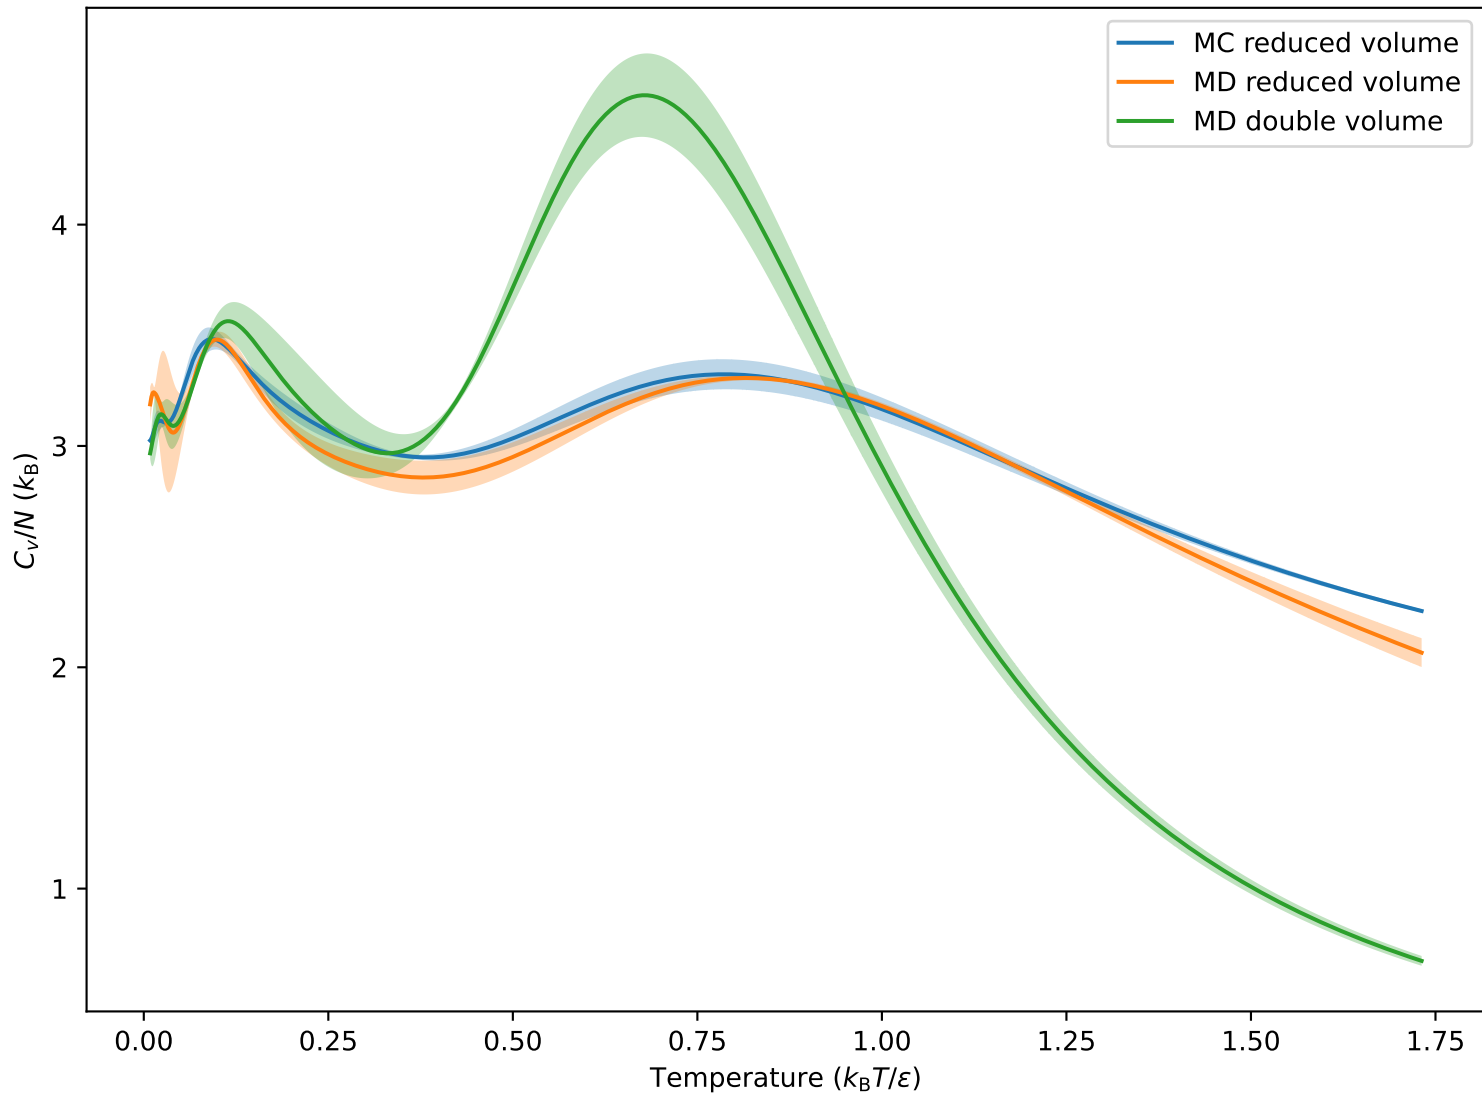

Supplement: d4cp00050a1.zip [file d4cp00050a1.zip]

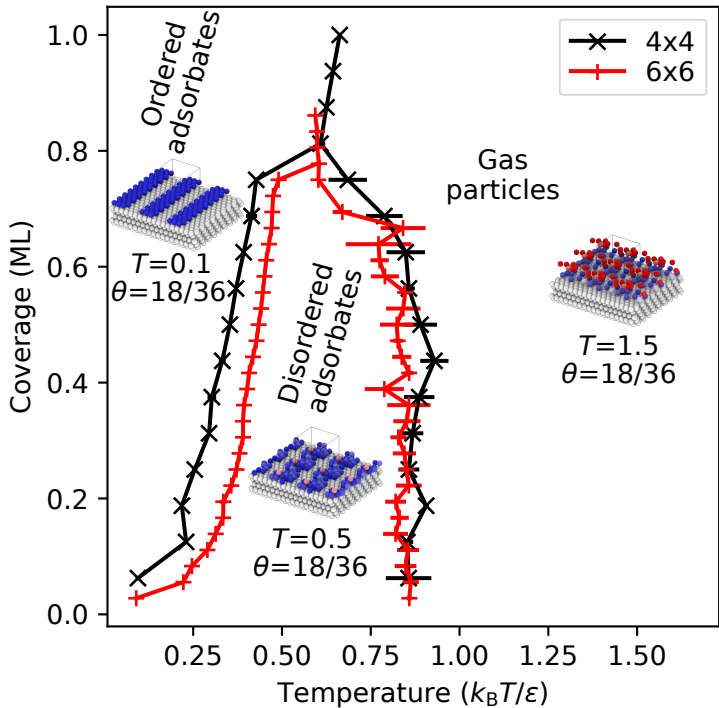

Supplement: d4cp00050a1.zip [file d4cp00050a1.zip]

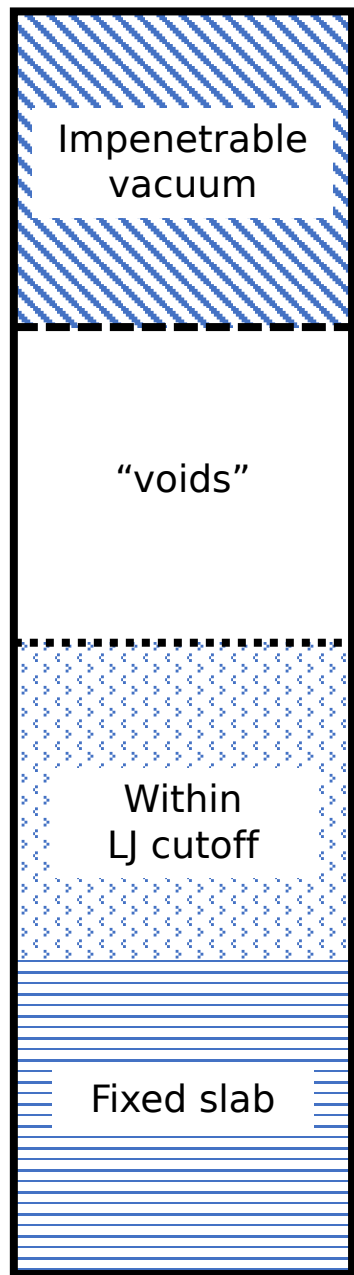

(a)

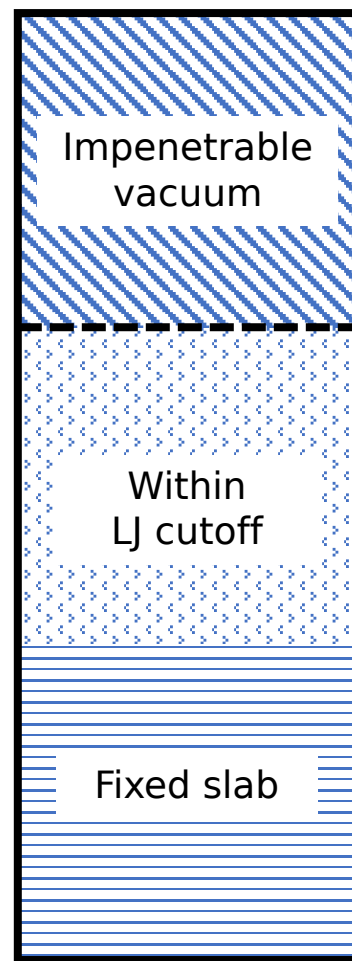

(b)

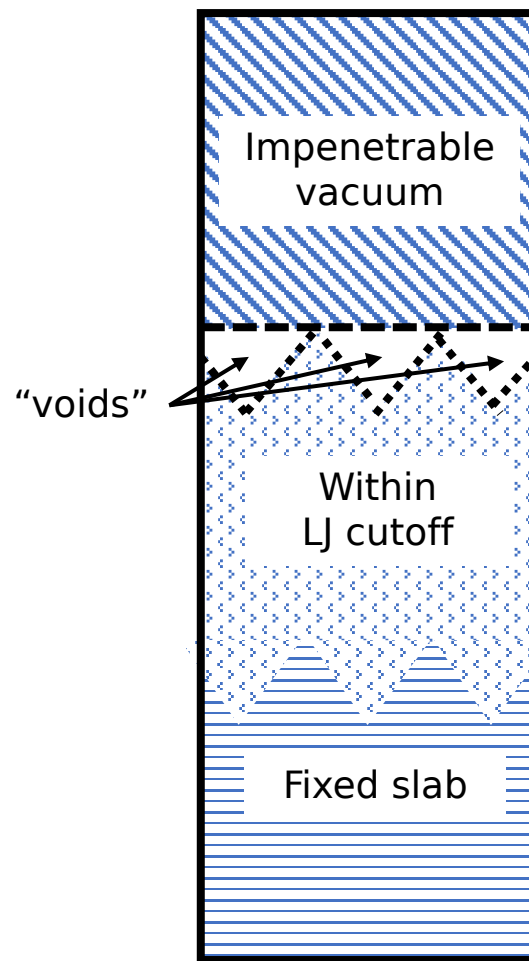

(c)

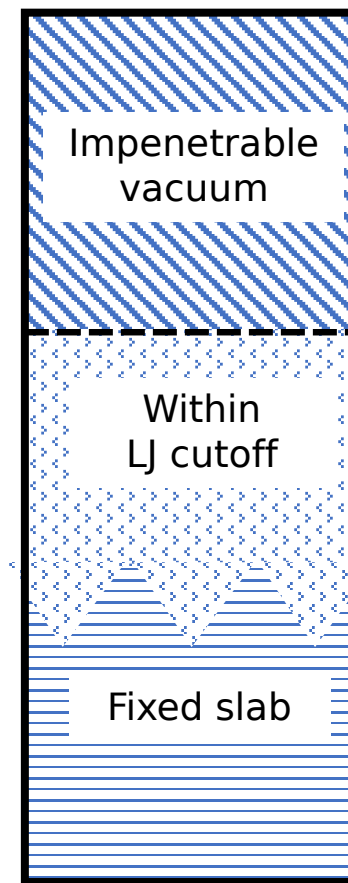

(d)

Supplement: d4cp00050a1.zip [file d4cp00050a1.zip]

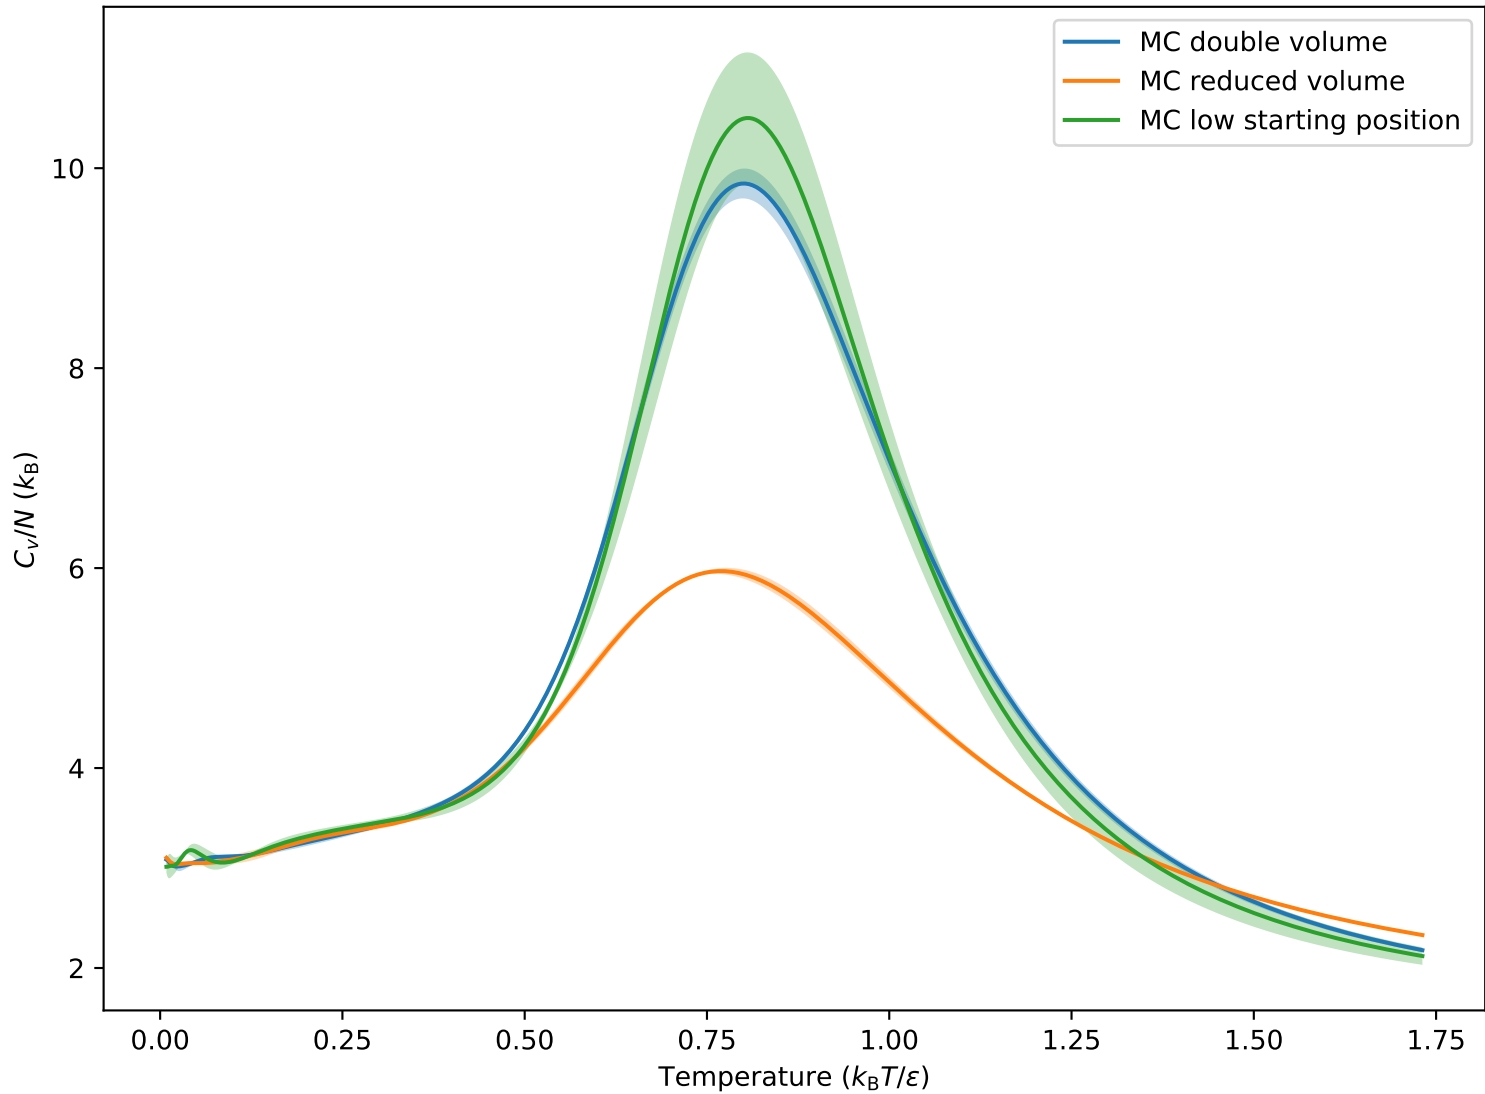

Supplement: d4cp00050a1.zip [file d4cp00050a1.zip]

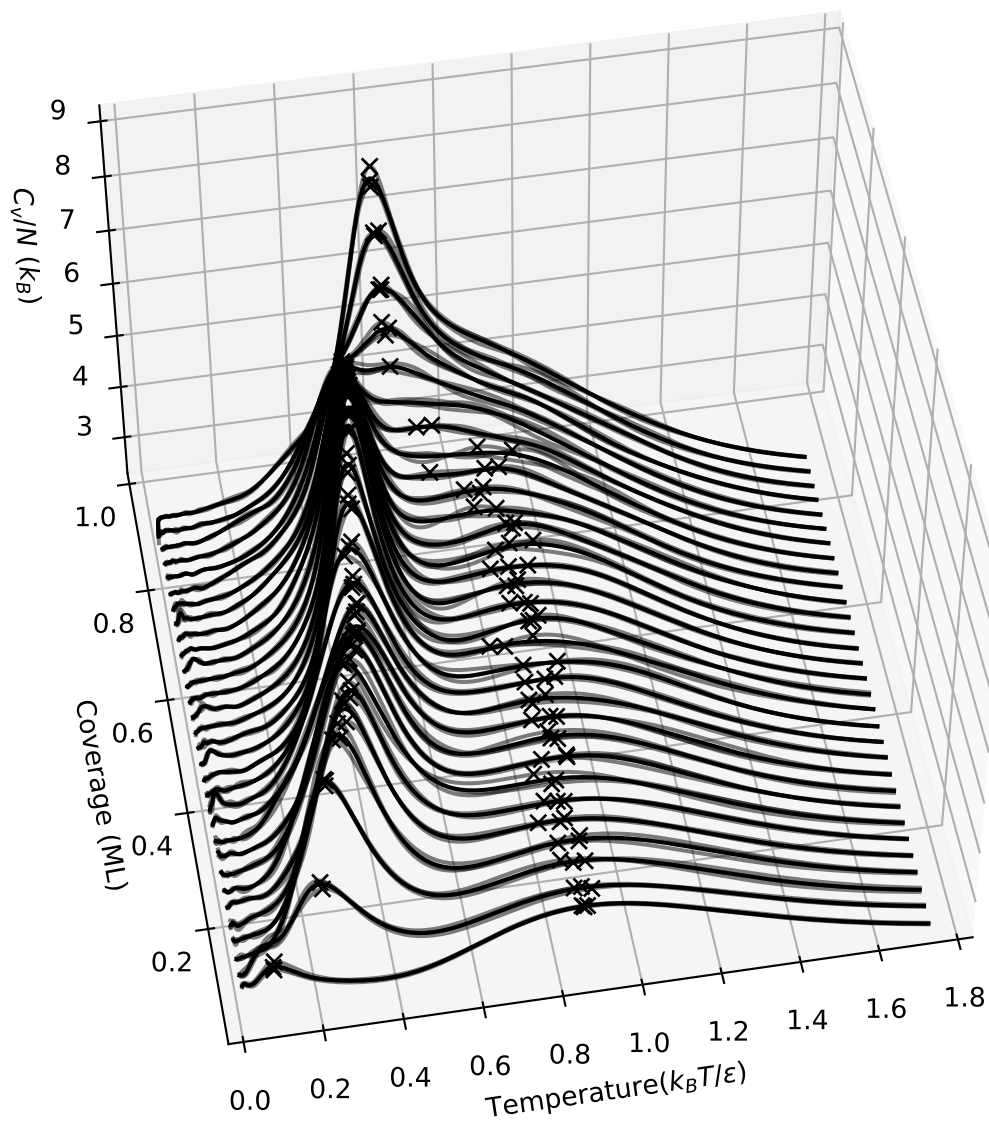

Supplement: d4cp00050a1.zip [file d4cp00050a1.zip]

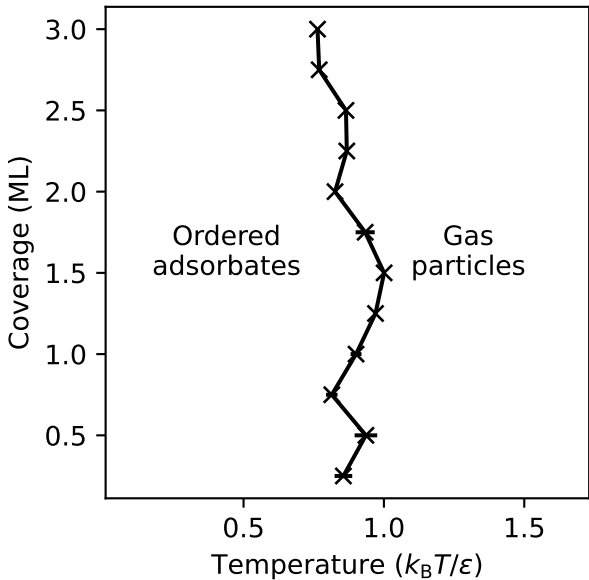

Supplement: d4cp00050a1.zip [file d4cp00050a1.zip]

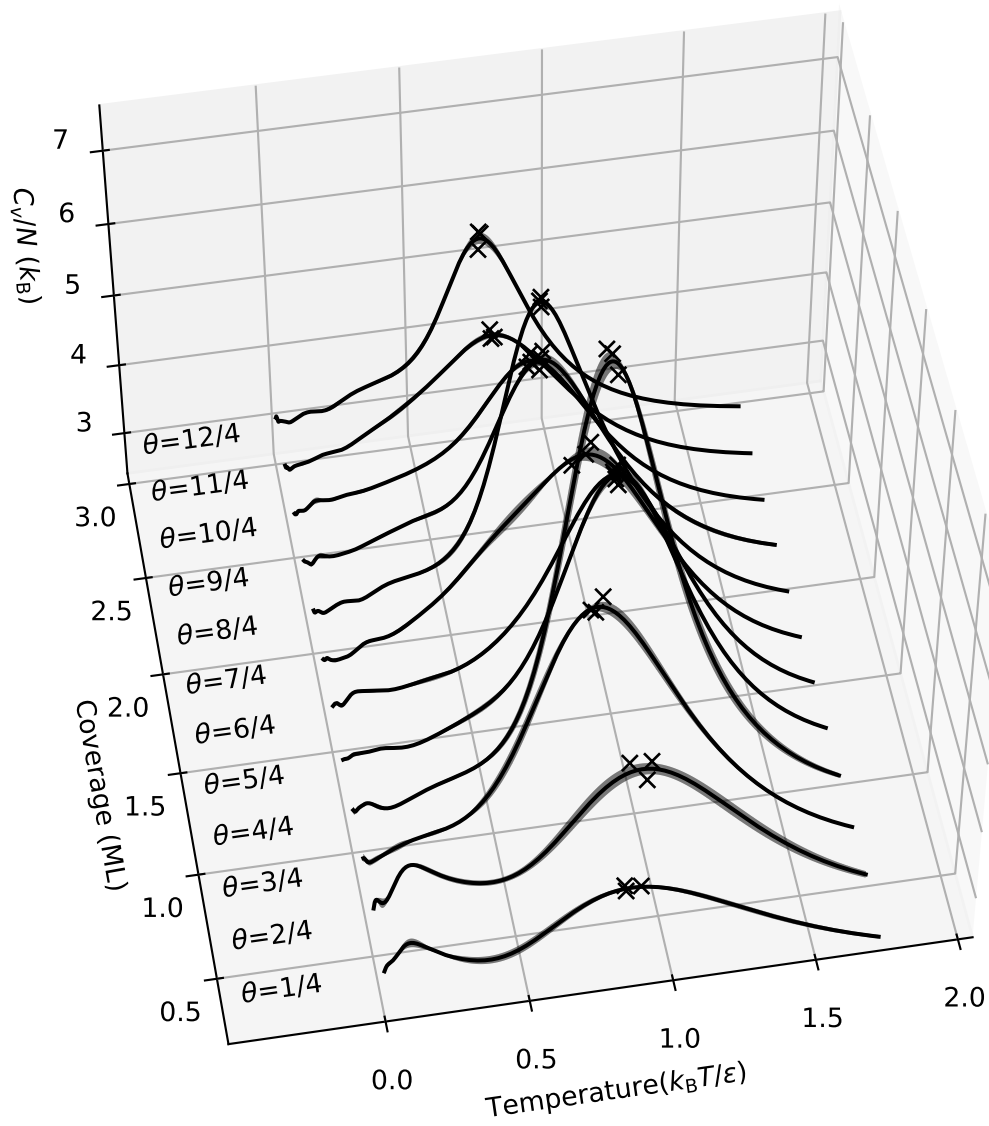

Supplement: d4cp00050a1.zip [file d4cp00050a1.zip]
